# Supplementary material for: (−)-Naringenin 4′,7-dimethyl Ether Isolated from Nardostachys jatamansi Relieves Pain through Inhibition of Multiple Channels
Source: MDPI journal article supplement (doi:10.3390/molecules27051735), 2022-03-07
Supplement: s1 [file s1]

# Supplementary Materials

## 1. Experimental Section

### Cell culture, Electrophysiology and Data analysis

HEK293 cells stably expressing human TRPA1 channels were cultured in a high-glucose DMEM medium (Gibco) containing 10% FBS (Gibco) and were selected 400  $\mu\text{g/mL}$  of the antibiotic Hygromycin B (Invitrogen) and 15  $\mu\text{g/mL}$  Blasticidin under standard tissue culture conditions (5%  $\text{CO}_2$ , 37  $^\circ\text{C}$ ). The cell line was induced with 1  $\mu\text{g/mL}$  doxycycline (Invitrogen) 24 h prior to the experiment. A standard whole-cell voltage-clamp technique was used to record TRPA1 currents from the cell lines. Pipettes were pulled from borosilicate glass capillaries and the resistances of pipettes were 3 ~ 5  $\text{M}\Omega$  when they were filled with the intracellular solution and placed in the bath. The pipette or intracellular solution contained (in mM): 140 CsCl, 10 HEPES, 5 EGTA, 0.1  $\text{CaCl}_2$  and 1  $\text{MgCl}_2$  (pH 7.2 adjusted by CsOH); bath or extracellular solution contained (in mM): 140 NaCl, 5 KCl, 0.5 EGTA, 1  $\text{MgCl}_2$ , 10 Glucose and 10 HEPES (pH 7.4 adjusted by NaOH). TRPA1 currents development was monitored with repetitive injections of 300 ms duration voltage ramps from  $-100$  to  $+100$  mV every 2 s and the holding potential was set to 0 mV for 50 ms, existing in both sides of the voltage ramp. Data acquisition was performed at room temperature using EPC-10 amplifier and Patch Master Software (HEKA), and the signals were sampled at 10 kHz and low-pass filtered at 2.9 kHz. Compounds including AITC (allyl isothiocyanate), HC030031, or (–)-NRG-DM were dissolved in the bath solution and applied using a multi-barrel solution exchanger. Data were presented as the mean  $\pm$  SEM. Statistical analyses were performed using Student's *t*-test (GraphPad Prism 5 Software). Asterisks (\*) indicate statistically significant differences from the control group (\* $P < 0.05$ , \*\* $P < 0.01$  and \*\*\* $P < 0.001$ ).

### General Experimental Procedures

Optical rotations were recorded on an IP-digi300/2 polarimeter (InsMark, Shanghai, China). The nuclear magnetic resonance (NMR) spectra were recorded at 25  $^\circ\text{C}$  at 400 MHz for  $^1\text{H}$  and 100 MHz for  $^{13}\text{C}$  on a Bruker Avance III-400 spectrometer and the Bruker topspin 2.1 software was used to process the NMR spectra. High-resolution electrospray ionization mass spectrometry (HR-ESIMS) was obtained on a Bruker microTOF-Q II mass spectrometer. The silica gel of 200–300 mesh was purchased from Qingdao Marine Chemical Factory of China. Prep-HPLC separation was performed on a prep-HPLC

made by Hanbon Sci & Tech of China. TLC detections were conducted by spraying with 5% H<sub>2</sub>SO<sub>4</sub> in ethanol (v/v) and then heating.

### Plant Material

The roots and rhizomes of *Nardostachys jatamansi* DC. were purchased from the Yellow River medicinal materials market of Lanzhou in 2017. The sample was botanically identified by Prof. Huan-Yang Qi and a voucher specimen (NCB-HHTS-201701) has been deposited at the CAS Key Laboratory of Chemistry of Northwestern Plant Resources.

### Extraction and Isolation

The dried roots and rhizomes of *N. jatamansi* (10 kg) were powered and extracted with methanol at room temperature (3 × 100 L, each for 7 days), and the extract was evaporated to dryness to obtain a 1.8 kg extract. Then, the extract was suspended in water and partitioned with petrol ether (PE, 3 × 1.0 L), EtOAc (3 × 1.0 L), and *n*-BuOH (3 × 1.0 L), respectively. The EtOAc part (220.0 g) was separated by silica gel column chromatography with a gradient of PE/ EtOAc (10:0-0:10) to yield nine fractions (Fr. 1-Fr. 9). Colorless columnar crystals were precipitated in the third fraction. After removing the crystals with acetone, the remaining part of Fr. 3 (6.2 g) was separated by silica gel CC and eluted with a gradient of PE/ EtOAc (10:1-1:1) to obtain twelve fractions (Fr. 3.1–Fr. 3.12). Fr. 3.2 (1.4 g) was further purified by HPLC (eluting with 72% MeOH in water, flow rate of 4 mL/min) to yield (–)-NRG-DM (980.0 mg, *t<sub>R</sub>* = 19.7 min).

**(–)-NRG-DM White needle crystal.**  $[\alpha]_D^{20} +7.8$  (*c* 0.22 in CH<sub>2</sub>Cl<sub>2</sub>). <sup>1</sup>H NMR (400 MHz, CDCl<sub>3</sub>)  $\delta_H$ : 12.03 (1H, s, 5-OH), 7.38 (2H, d, *J* = 8.4 Hz, H-2', 6'), 6.95 (2H, d, *J* = 8.4 Hz, H-3', 5'), 6.06 (1H, s, H-8), 6.04 (1H, s, H-6), 5.37 (1H, dd, *J* = 12.8, 2.4 Hz, H-2), 3.83 (3H, s, OCH<sub>3</sub>), 3.80 (3H, s, OCH<sub>3</sub>), 3.10 (1H, dd, *J* = 17.2, 13.2 Hz, H-3a), 2.79 (1H, dd, *J* = 17.2, 2.8 Hz, H-3b). <sup>13</sup>C NMR (150 MHz, CDCl<sub>3</sub>)  $\delta_C$ : 196.1 (C-4), 168.0 (C-7), 164.2 (C-5), 162.9 (C-9), 160.1 (C-4'), 130.4 (C-1'), 127.8 (C-2', 6'), 114.2 (C-3', 5'), 103.2 (C-10), 95.1 (C-6), 94.2 (C-8), 79.0 (C-2), 55.7, 55.4 (2 × OCH<sub>3</sub>), 43.2 (C-3). (+)-HRESIMS: *m/z* 323.088 5 [M + Na]<sup>+</sup> (calcd. for C<sub>17</sub>H<sub>16</sub>O<sub>5</sub>Na, 323.089 0), and 623.187 9 [2M + Na]<sup>+</sup> (calcd. for C<sub>34</sub>H<sub>32</sub>O<sub>10</sub>Na, 623.188 8) [1-3].

## 2. References

1. Ya-yun Wang, Guo-xu Ma, Zhen Huang, Xiao-ming Zhong, Xu-dong Xu, Jing-quan Yuan. Identification of Compounds in Alien Invasive Plant *Chromolaena odorata*. *Chin Pharm J.* **2016**, 51(9): 698-702.
2. Kin-ichi Oyama, Tadao Kondo. Total synthesis of flavocommelin, a component of the blue supramolecular pigment from *Commelina communis*, on the basis of direct 6-C-glycosylation of flavan. *J. Org. Chem.* **2004**, 69, 5240-5246.
3. R. A. Zainullin, R. V. Kunakova, V. F. Gareev, I. V. Galyautdinov, Z. R. Sadretdinova, Z. S. Muslimov, V. N. Odinokov. Flavanones and flavones from Bashkir propolis. *Chem. Nat. Compd.* **2018**, 54(5): 975-977.

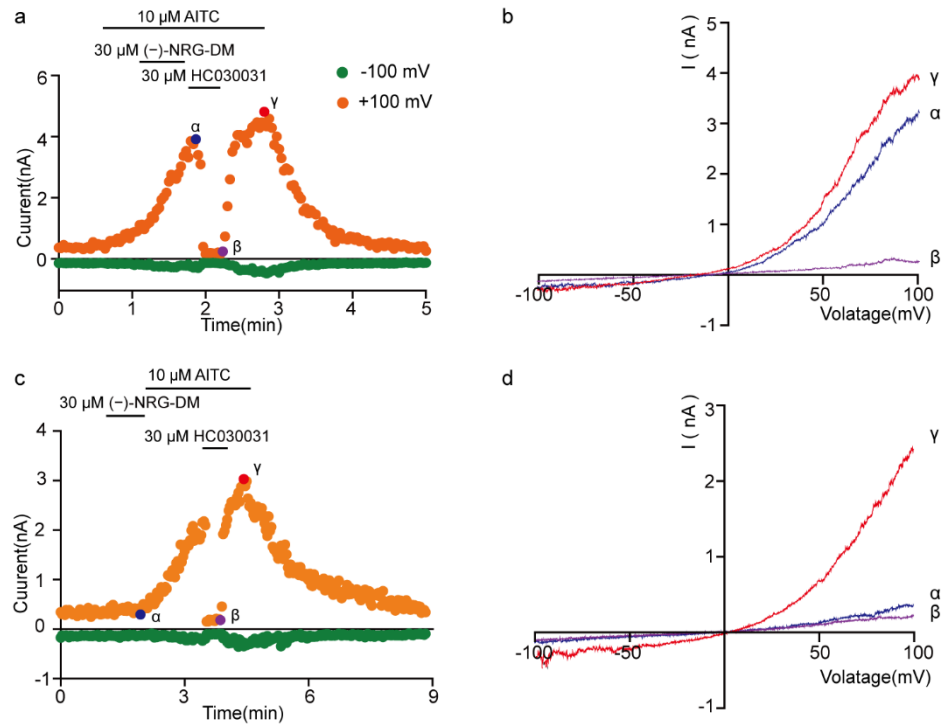

**Figure S1.** (-)-NRG-DM did not affect the TRPA1 channels. The HEK293 cells stably expressing human TRPA1 channels were used, the TRPA1 currents could be induced by 10  $\mu$ M AITC (allyl isothiocyanate) and inhibited by 30  $\mu$ M HC030031, which were used as TPRA1 channel activator and inhibitor, respectively. (-)-NRG-DM (30  $\mu$ M) did not enhance any TRPA1 currents or inhibit AITC-induced TRPA1 currents either. Representative time course (a, c) and current traces and the current-voltage (I-V) relationships (b, d) of human TRPA1 currents in the presence of compounds at indicated concentration.

## Mass Spectrum SmartFormula Report

### Analysis Info

Analysis Name D:\Data\user\mengxianhua 20211230-2.d  
 Method tune\_low.m  
 Sample Name gsg9  
 Comment

Acquisition Date 2021-12-30 17:20:50

Operator BDAL@DE  
 Instrument / Ser# micrOTOF-Q 20453

### Acquisition Parameter

|             |          |                       |           |                  |             |
|-------------|----------|-----------------------|-----------|------------------|-------------|
| Source Type | ESI      | Ion Polarity          | Positive  | Set Nebulizer    | 0.4 Bar     |
| Focus       | Active   | Set Capillary         | 4500 V    | Set Dry Heater   | 180 $\mu$ C |
| Scan Begin  | 100 m/z  | Set End Plate Offset  | -500 V    | Set Dry Gas      | 4.0 l/min   |
| Scan End    | 2000 m/z | Set Collision Cell RF | 300.0 Vpp | Set Divert Valve | Waste       |

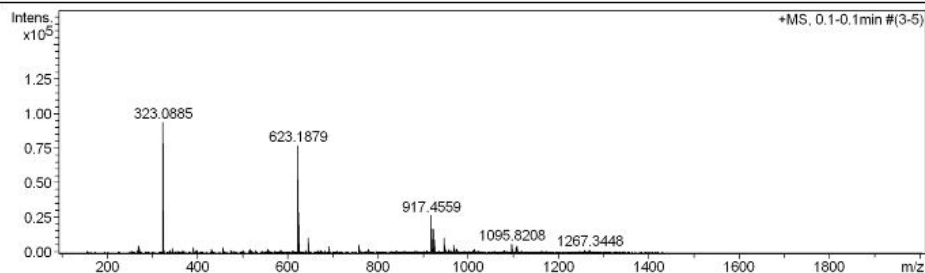

| Meas. m/z | # | Formula           | m/z      | err [ppm] | Me an err [ppm] | rdB  | N-Rule | e <sub>i</sub> % Conf | mS lgm a | Std l | Std Me an m/z | Std l Var Nor m | Std m/z Diff | Std Com b Dev |
|-----------|---|-------------------|----------|-----------|-----------------|------|--------|-----------------------|----------|-------|---------------|-----------------|--------------|---------------|
| 323.0885  | 1 | C 17 H 16 Na O 5  | 323.0890 | 1.5       | 1.6             | 9.5  | ok     | even                  | 8.8      | 15.8  | 0.6           | 6.5             | 0.1          | 842.7         |
| 623.1879  | 1 | C 34 H 32 Na O 10 | 623.1888 | 1.5       | 2.2             | 18.5 | ok     | even                  | 3.5      | 4.6   | 1.8           | 1.9             | 2.5          | 842.7         |

**Figure S2.** HRESIMS spectrum of (-)-NRG-DM

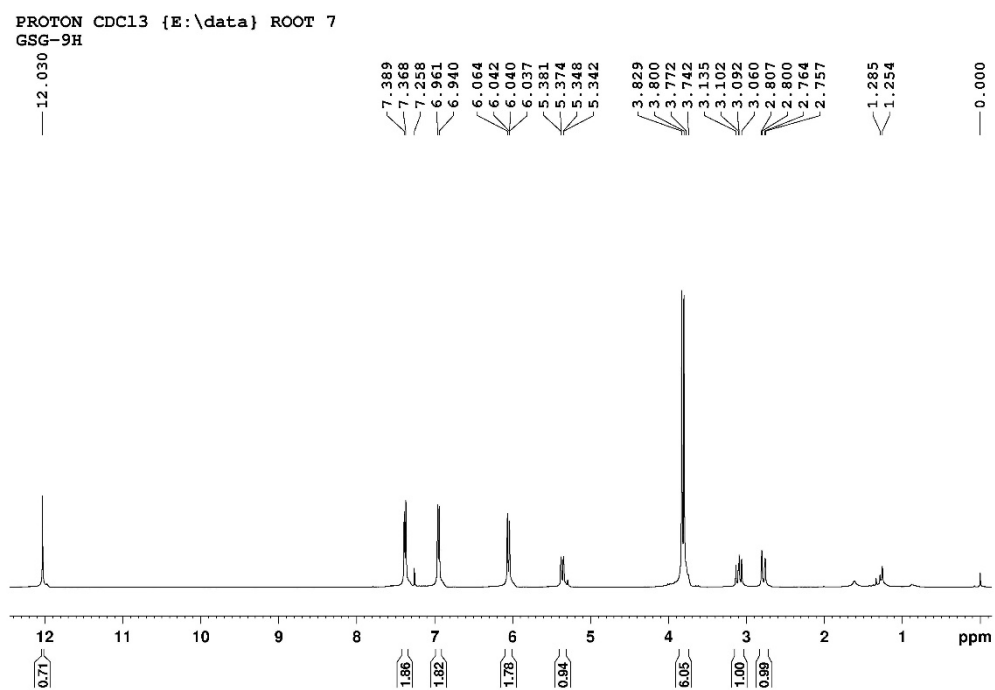

**Figure S3.** <sup>1</sup>H NMR spectrum of (–)-NRG-DM (400 MHz, CDCl<sub>3</sub>)

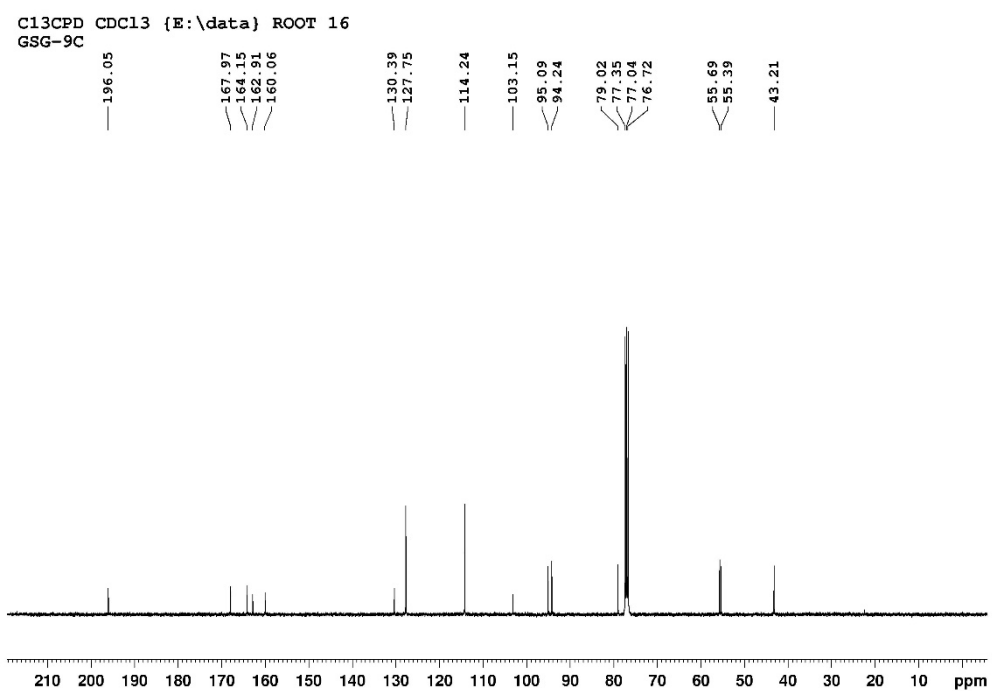

**Figure S4.**  $^{13}\text{C}$  NMR spectrum of (-)-NRG-DM (100 MHz,  $\text{CDCl}_3$ )
